# Supplementary material for: Altered oxidative stress, apoptosis/autophagy, and epigenetic modifications in Zearalenone-treated porcine oocytes
Source: Royal Society of Chemistry journal article supplement (doi:10.1039/c5tx00070j), 2015-01-01
Supplement: c5tx00070j1.pdf [file c5tx00070j1.pdf]

**Table 1.** List of primers used for quantitative real-time RT-PCR.

| Genes          | Genbank<br>Accession no. | Primer sequence                                       | Annealing<br>Temp(C) | Product<br>size |
|----------------|--------------------------|-------------------------------------------------------|----------------------|-----------------|
| <i>Gapdh</i>   | AK234838                 | F: AAGTTCCACGGCACAGTCAAG<br>R: CACCAGCATCACCCCATTT    | 60                   | 112             |
| <i>Beclin1</i> | NM_001044530             | F: AGGAGCTGCCGTTGTACTGT<br>R: CACTGCCTCTGTGTCTTCA     | 60                   | 189             |
| <i>Casp3</i>   | NM_214131                | F: GAGGCAGACTTCTTGTATGC<br>R: CATGGACACAATACATGGAA    | 55                   | 236             |
| <i>Lamp2</i>   | AK235422                 | F: GCTTTTGCAGCGTTGTGG<br>R: GACGAGGCAGAGCATAAGGAG     | 60                   | 169             |
| <i>ATG3</i>    | AK236659                 | F: CACGACTATGGTTGTTTGGCTAT<br>G<br>R:                 | 60                   | 127             |
| <i>ATG7</i>    | AK240528                 | F: AGATTGCCTGGTGGGTGGT<br>R: GGGTGATGCTGGAGGAGTTG     | 60                   | 140             |
| <i>ATG5</i>    | HM046510                 | F:<br>CCTGAAGATGGGGAAAGAAAGA<br>R: TCTGTTGGTTGCGGGATG | 60                   | 140             |
| <i>Bax</i>     | AJ606301                 | F: CGCTGGACTTCCTTCGAGAT<br>R: GGCGTCCCAAAGTAGGAGAG    | 60                   | 85              |
| <i>Lc3</i>     | NM_001190290             | F: CCGAACCTTCGAACAGAGAG<br>R: AGGCTTGGTTAGCATTGAGC    | 60                   | 206             |
| <i>Bak</i>     | AJ001204                 | F: CTAGAACCTAGCAGCACCAT<br>R: CGATCTTGGTGAAGTACTC     | 60                   | 151             |
| <i>mTOR</i>    | XM_003127584             | F: GCACAAGGACGGATTCCCTAC<br>R: CACTTGCCTTGGGACATC     | 55                   | 248             |
| <i>Bcl-xL</i>  | AF216205                 | F: ACTGAATCAGAAGCGGAAAC<br>R: AAAGCTCTGATACGCTGTCC    | 60                   | 294             |
| <i>ASH2L</i>   | XM_003125708             | F: ATCTCTGATGACCGGCTGAC<br>R: CCAATGGACTGGTGGAACTT    | 60                   | 259             |
| <i>EED</i>     | XM_003482581             | F: GAATATGTCCGAGAGGGAAAGTG<br>R: GGTGTATCAGGGCGTTCAGT | 60                   | 191             |
| <i>DNMT3a</i>  | XM_005662686             | F: AATCGCAACAGGGTACTTGG<br>R: TTTCTGGCTGGATTCACAT     | 55                   | 258             |
| <i>DNMT3b</i>  | XM_005672839             | F: TCCGGGTGCTGTCTCTATTT<br>R: TGACGATGGAGAGGTCATTG    | 60                   | 269             |
| <i>SUV39H2</i> | XM_005668117             | F: AATGAAGCCACCTTTGGTTG<br>R: ATTGGGACAATCAGGTCCAC    | 60                   | 191             |
| <i>SUZ12</i>   | XM_005669066             | F: GGATATTCATCGCCAACCTG<br>R: TGTATGTTGCTGCTGTTC      | 60                   | 181             |
| <i>SETDB1</i>  | XM_005663487             | F: GCGACAAATCCAAGTGTGC<br>R: TGCAGCGTTTGTACACTCA      | 60                   | 140             |
| <i>EZH2</i>    | NM_001244309             | F: CATGTCGCCAGGTGTATGAG                               | 60                   | 208             |

|              |              |                                                    |    |     |
|--------------|--------------|----------------------------------------------------|----|-----|
|              |              | R: GTCGCAGGGCTGATAGTTGT                            |    |     |
| <i>CAT</i>   | NM_214301    | F: GCTTTAGTGCTCCCGAACAG<br>R: TGTTCTCACACAGGCGTTTC | 60 | 185 |
| <i>SOD1</i>  | NM_001190422 | F: GAGACCTGGGCAATGTGACT<br>R: CCAAACGACTTCCAGCATTT | 60 | 209 |
| <i>SOD2</i>  | NM_214127    | F: ACAACCTGAACGTCGTGGA<br>R: GACGGATACAGCGGTCAACT  | 60 | 262 |
| <i>Prdx2</i> | NM_001244474 | F: TTCTACCCGCTGGATTTTAC<br>R: CATCTTCCTTCAGCACACCA | 60 | 261 |
| <i>Prdx6</i> | NM_214408.   | F: GAAGACCATCTTGCCTGGAG<br>R: GCCAGTGGTAGCTGGGTAGA | 60 | 254 |
| <i>Gpx</i>   | NM_214407    | F: ATTCTCAGCCAAGGACATCG<br>R: TTTGACGTTGTAGCCAGCAG | 60 | 270 |

---
